# Supplementary material
Source: Springer Nature journal article supplement (https://www.springermedizin.de/resource/supplementary/12961_2008_73_MOESM3_ESM.pdf/9571356)

Barriers

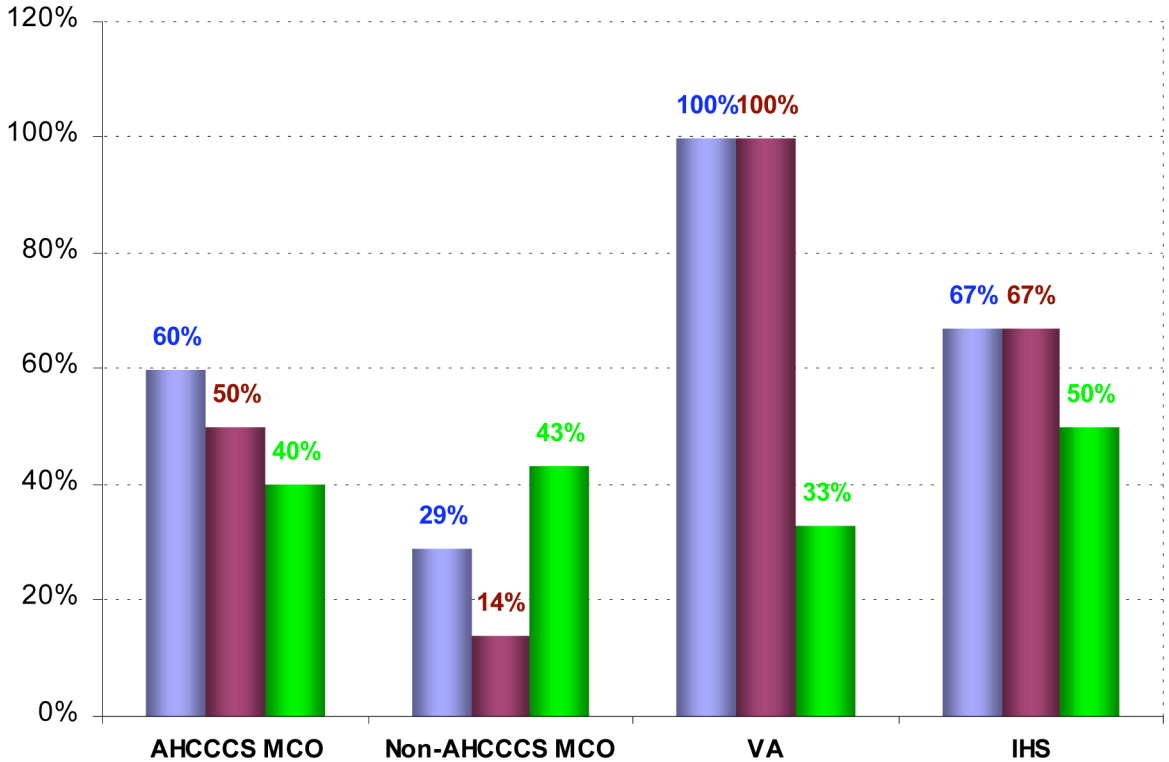

■ Insufficient Staff ■ Insufficient Funding ■ Competing Priorities

Supplement: MOESM3 [file 9571356]
